# Supplementary material for: Facile construction of flower-like MoO2/MoS2 heterostructures encapsulated in nitrogen-doped carbon for high-performance sodium-ion storage
Source: Royal Society of Chemistry journal article supplement (doi:10.1039/d4nj01663g), 2024-01-01
Supplement: d4nj01663g1.pdf [file d4nj01663g1.pdf]

**Facile construction of flower-like MoO<sub>2</sub>/MoS<sub>2</sub> heterostructures encapsulated  
in nitrogen-doped carbon for high-performance sodium-ion storage**

Chao Li<sup>a,b,\*</sup>, Kangzhe Cao<sup>a,b</sup>, Sitong Lu<sup>a</sup>, Qing Li<sup>a,b</sup>, Yu Zhang<sup>a,b,\*</sup>

<sup>a</sup>College of Chemistry and Chemical Engineering, Xinyang Normal University,  
Xinyang 464000, China

<sup>b</sup>Xinyang Key Laboratory of Low-Carbon Energy Materials, Xinyang Normal  
University, Xinyang 464000, China

\*Corresponding authors: lichao98.3.6@163.com (Chao Li); zhangyu@xynu.edu.cn  
(Yu Zhang)

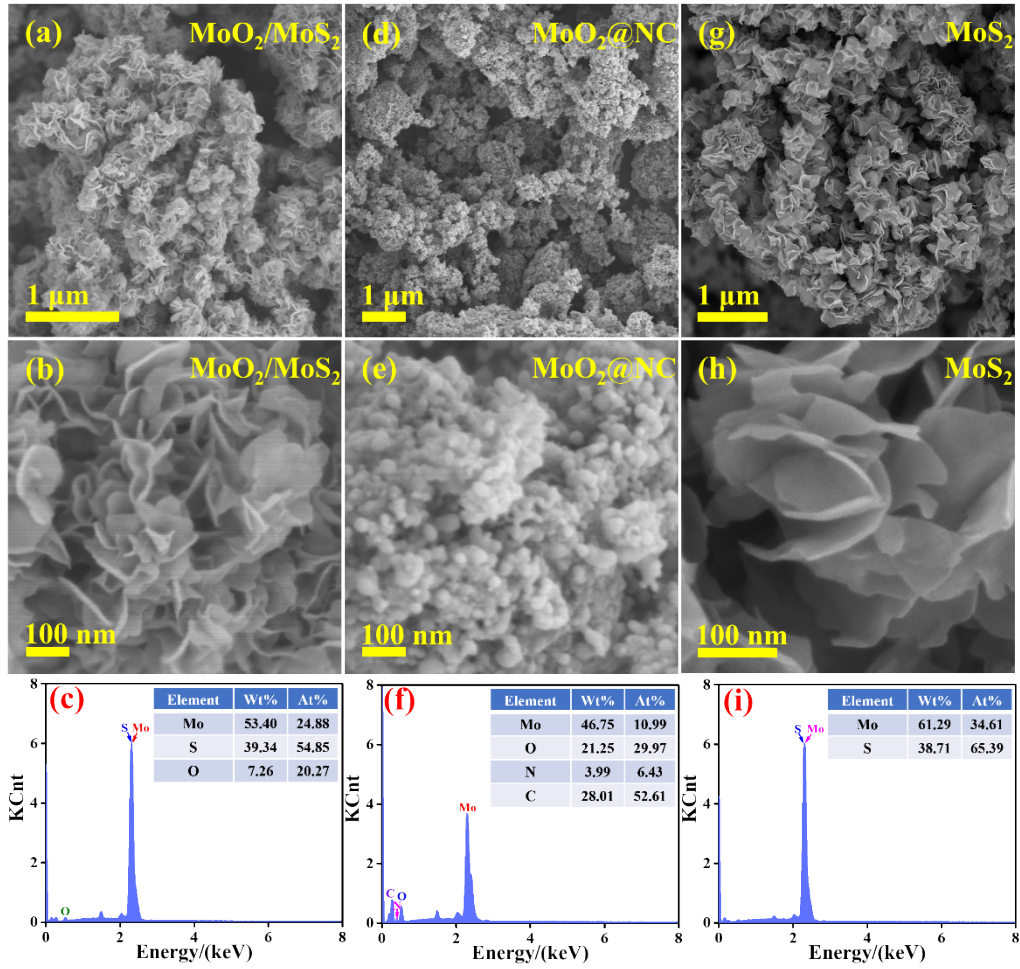

**Fig. S1** Low- and high-resolution SEM images for (a-b) MoO<sub>2</sub>/MoS<sub>2</sub>, (d-e) MoO<sub>2</sub>@NC, and (g-h) MoS<sub>2</sub>, respectively; EDS spectra for (c) MoO<sub>2</sub>/MoS<sub>2</sub>, (f) MoO<sub>2</sub>@NC, and (i) MoS<sub>2</sub>, respectively.

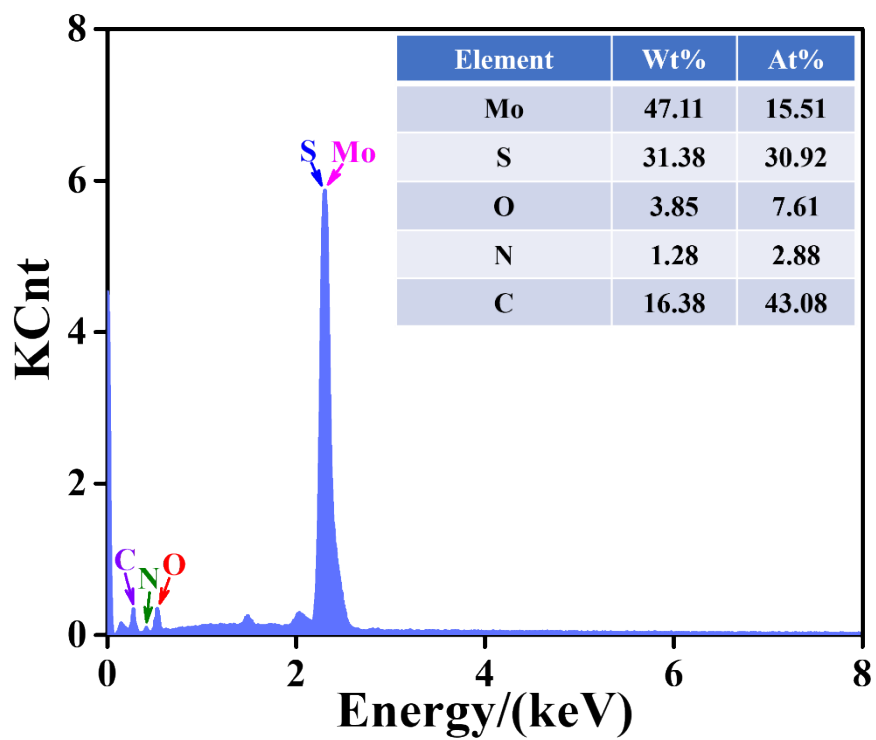

Fig. S2 EDS spectrum for the MoO<sub>2</sub>/MoS<sub>2</sub>@NC.

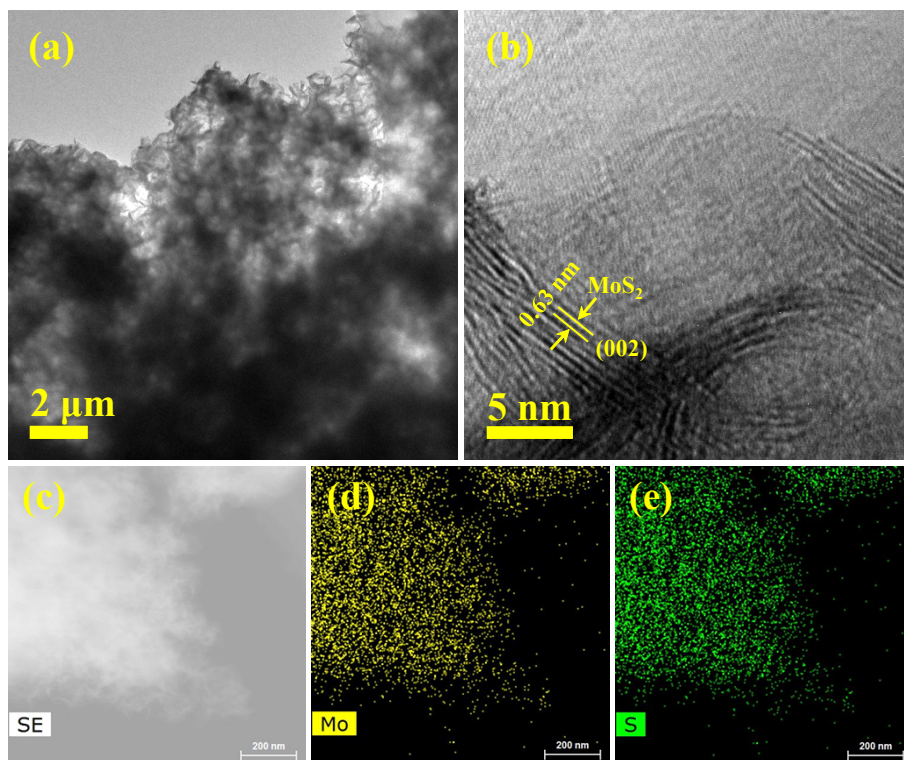

**Fig. S3** (a) TEM and (b) HRTEM images for the MoS<sub>2</sub>; (c-e) Elemental color mapping for MoS<sub>2</sub>.

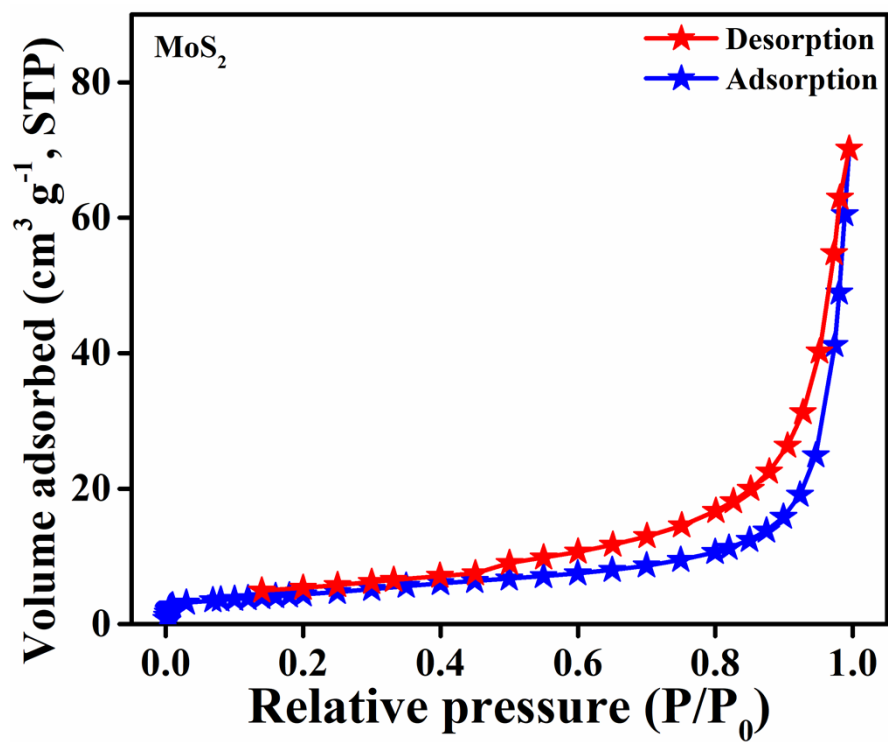

Fig. S4 N<sub>2</sub> adsorption-desorption isotherms for MoS<sub>2</sub>.

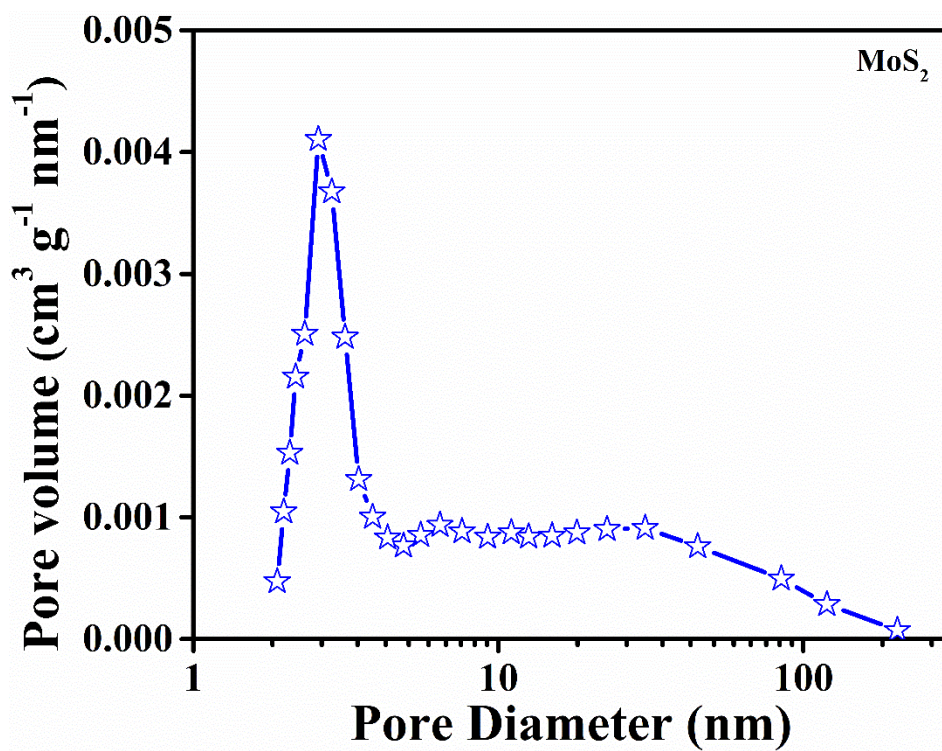

Fig. S5 Pore size distribution for the MoS<sub>2</sub>.

**Table S1** Rate performance comparisons for the MoO<sub>2</sub>/MoS<sub>2</sub>@NC, MoO<sub>2</sub>/MoS<sub>2</sub>, MoO<sub>2</sub>@NC, and MoS<sub>2</sub> anodes.

| Anodes                                 | Current density (A g <sup>-1</sup> ) and Specific capacity (mAh g <sup>-1</sup> ) |       |       |       |       |       |
|----------------------------------------|-----------------------------------------------------------------------------------|-------|-------|-------|-------|-------|
|                                        | 0.1 A g <sup>-1</sup>                                                             | 0.5   | 2.0   | 5.0   | 10.0  | 0.1   |
| MoO <sub>2</sub> /MoS <sub>2</sub> @NC | 593.1 mAh g <sup>-1</sup>                                                         | 524.2 | 456.1 | 395.8 | 337.5 | 630.6 |
| MoO <sub>2</sub> /MoS <sub>2</sub>     | 487.3 mAh g <sup>-1</sup>                                                         | 420.9 | 372.9 | 312.5 | 258.4 | 468.6 |
| MoO <sub>2</sub> @NC                   | 346.9 mAh g <sup>-1</sup>                                                         | 296.5 | 266.1 | 228.7 | 199.4 | 311.7 |
| MoS <sub>2</sub>                       | 388.7 mAh g <sup>-1</sup>                                                         | 352.4 | 308.2 | 258.1 | 203.7 | 392.4 |

**Table S2** EIS spectra fitting results for the MoO<sub>2</sub>/MoS<sub>2</sub>@NC, MoO<sub>2</sub>/MoS<sub>2</sub>, MoO<sub>2</sub>@NC, and MoS<sub>2</sub> anodes in Na half-cells.

| <b>Anodes</b>                          | <b>R<sub>e</sub> (Ω)</b> | <b>R<sub>ct</sub> (Ω)</b> |
|----------------------------------------|--------------------------|---------------------------|
| MoO <sub>2</sub> /MoS <sub>2</sub> @NC | 4.3                      | 330                       |
| MoO <sub>2</sub> /MoS <sub>2</sub>     | 5.2                      | 362                       |
| MoO <sub>2</sub> @NC                   | 4.6                      | 343                       |
| MoS <sub>2</sub>                       | 9.9                      | 378                       |
